# Supplementary material for: Contributions of primary emissions and secondary formation to nitrated aromatic compounds in themountain background region of Southeast China
Source: Copernicus journal article supplement (doi:10.5194/acp-23-6835-2023), 2023-06-21
Supplement: Supplementary file 1 [file acp-23-6835-2023-supplement.pdf]

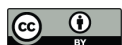

*Supplement of*

## **Contributions of primary emissions and secondary formation to nitrated aromatic compounds in the mountain background region of Southeast China**

**Yanqin Ren et al.**

*Correspondence to:* Gehui Wang ([ghwang@geo.ecnu.edu.cn](mailto:ghwang@geo.ecnu.edu.cn)) and Jie Wei ([weijie@igsnr.ac.cn](mailto:weijie@igsnr.ac.cn))

The copyright of individual parts of the supplement might differ from the article licence.

Table S1 Limit of detection (LOD) and concentrations in blank samples of the target compounds in this study.

| Compounds <sup>a</sup> | m/z <sup>b</sup> | LOD (ng $\mu$ L <sup>-1</sup> ) | Concentrations in blank samples (ng m <sup>-3</sup> ) |                 |                 |                 |
|------------------------|------------------|---------------------------------|-------------------------------------------------------|-----------------|-----------------|-----------------|
|                        |                  |                                 | Spring                                                | Summer          | Autumn          | Winter          |
| 4NP                    | 196              | 0.000407                        | NA <sup>c</sup>                                       | NA <sup>c</sup> | 0.046824        | 0.018609        |
| 3M4NP                  | 210              | 0.000109                        | NA <sup>c</sup>                                       | NA <sup>c</sup> | NA <sup>c</sup> | 0.000757        |
| 4NGA                   | 211              | 0.001422                        | 0.001549                                              | 0.003857        | 0.005888        | 0.002407        |
| 5NGA                   | 211              | 0.001209                        | 0.003656                                              | 0.000730        | 0.003529        | NA <sup>c</sup> |
| 4NC                    | 284              | 0.006847                        | NA <sup>c</sup>                                       | NA <sup>c</sup> | NA <sup>c</sup> | NA <sup>c</sup> |
| 2,4-DNP                | 241              | 0.006842                        | 0.017479                                              | 0.008151        | 0.002099        | NA <sup>c</sup> |
| 4M5NC                  | 313              | 0.000233                        | 0.073688                                              | 0.054543        | 0.034838        | 0.012273        |
| 3NSA                   | 312              | 0.000337                        | 0.000362                                              | NA <sup>c</sup> | NA <sup>c</sup> | NA <sup>c</sup> |
| 5NSA                   | 312              | 0.000261                        | NA <sup>c</sup>                                       | NA <sup>c</sup> | NA <sup>c</sup> | NA <sup>c</sup> |

<sup>a</sup>4NP:4-nitrophenol; 3M4NP:3-methyl-4-nitrophenol; 2,4-DNP:2,4-dinitrophenol; 4NGA:4-nitroguaiacol; 5NGA:5-nitroguaiacol;4NC:4-nitrocatechol; 4M5NC:4-methyl-5-nitrocatechol; 3NSA:3-nitrosalicylic acid; 5NSA:5-nitrosalicylic acid.

<sup>b</sup> Mass-to-charge ratio of fragment ions for qualification and quantification.

<sup>c</sup> NA: not available.

Table S2 Values of  $Q$  (robust),  $Q$  (true) and average  $r^2$  for the modeling results in the whole sampling period.

| <b>species</b>                 | <b>the whole sampling period</b> |
|--------------------------------|----------------------------------|
| $Q$ (robust)                   | 2120                             |
| $Q$ (true)                     | 2270                             |
| $SO_2(r^2)$                    | 0.948                            |
| $NO_2(r^2)$                    | 0.837                            |
| $O_3(r^2)$                     | 0.586                            |
| $SO_4^{2-}(r^2)$               | 0.958                            |
| $NO_3^-(r^2)$                  | 0.933                            |
| $NH_4^+(r^2)$                  | 0.962                            |
| $K^+(r^2)$                     | 0.905                            |
| ff- <i>n</i> -alkanes( $r^2$ ) | 0.915                            |
| PAHs( $r^2$ )                  | 0.934                            |
| levoglucosan( $r^2$ )          | 0.962                            |
| 4NP( $r^2$ )                   | 0.962                            |
| 3M4NP( $r^2$ )                 | 0.512                            |
| 4NGA( $r^2$ )                  | 0.692                            |
| 5NGA( $r^2$ )                  | 0.796                            |
| 4NC( $r^2$ )                   | 0.852                            |
| 4M5NC( $r^2$ )                 | 0.715                            |
| 3NSA( $r^2$ )                  | 0.871                            |
| 5NSA( $r^2$ )                  | 0.954                            |

Table S3. Pearson correlations between individual NAC species and meteorological parameters, aerosol components, and gas pollutants during spring (n = 11).

|                               | NACs    | 4NP     | 3M4NP   | 2,4-DNP | 4NGA    | 5NGA    | 4NC     | 4M5NC   | 3NSA    | 5NSA    |
|-------------------------------|---------|---------|---------|---------|---------|---------|---------|---------|---------|---------|
| PM <sub>2.5</sub>             | 0.818** | 0.803** | 0.655*  | 0.165   | 0.594   | 0.756** | 0.713*  | 0.880** | 0.648*  | 0.684*  |
| SO <sub>2</sub>               | 0.736** | 0.789** | 0.874** | 0.234   | 0.126   | 0.386   | 0.714*  | 0.630*  | 0.700*  | 0.696*  |
| NO <sub>2</sub>               | 0.945** | 0.930** | 0.457   | (0.037) | 0.115   | 0.803** | 0.950** | 0.709*  | 0.934** | 0.943** |
| O <sub>3</sub>                | 0.783** | 0.805** | 0.855** | 0.245   | 0.275   | 0.588   | 0.704*  | 0.803** | 0.665*  | 0.684*  |
| ff- <i>n</i> -alkanes         | 0.736** | 0.704*  | 0.526   | 0.607*  | 0.215   | 0.481   | 0.690*  | 0.640*  | 0.721*  | 0.716*  |
| PAHs                          | 0.794** | 0.826** | 0.612*  | (0.039) | 0.261   | 0.562   | 0.772** | 0.668*  | 0.748** | 0.784** |
| Levoglucosan                  | 0.933** | 0.936** | 0.422   | 0.122   | (0.115) | 0.621*  | 0.975** | 0.684*  | 0.985** | 0.966** |
| K <sup>+</sup>                | 0.780** | 0.766** | 0.454   | 0.158   | 0.416   | 0.664*  | 0.705*  | 0.818** | 0.679*  | 0.706*  |
| SO <sub>4</sub> <sup>2-</sup> | 0.545   | 0.535   | 0.6     | 0.336   | 0.609*  | 0.458   | 0.422   | 0.773** | 0.36    | 0.382   |
| NO <sub>3</sub> <sup>-</sup>  | 0.790** | 0.786** | 0.113   | (0.093) | (0.202) | 0.574   | 0.860** | 0.468   | 0.883** | 0.890** |
| NH <sub>4</sub> <sup>+</sup>  | 0.701*  | 0.696*  | 0.662*  | 0.354   | 0.561   | 0.564   | 0.592   | 0.822** | 0.543   | 0.569   |

\*\*Significant correlation at the 0.01 level.

\*Significant correlation at the 0.05 level.

Red data in parentheses represent negative values.

Table S4. Pearson correlations between individual NAC species and meteorological parameters, aerosol components, and gas pollutants during summer (n = 13).

|                               | NACs    | 4NP     | 3M4NP   | 2,4-DNP | 4NGA    | 5NGA    | 4NC     | 4M5NC   | 3NSA    | 5NSA    |
|-------------------------------|---------|---------|---------|---------|---------|---------|---------|---------|---------|---------|
| PM <sub>2.5</sub>             | 0.875** | 0.940** | 0.619*  | 0.058   | 0.679*  | 0.749** | 0.926** | 0.759** | 0.820** | 0.930** |
| SO <sub>2</sub>               | 0.859** | 0.794** | 0.585*  | 0.267   | 0.585*  | 0.763** | 0.889** | 0.819** | 0.743** | 0.823** |
| NO <sub>2</sub>               | 0.869** | 0.865** | 0.537   | 0.311   | 0.629*  | 0.697** | 0.929** | 0.863** | 0.866** | 0.834** |
| O <sub>3</sub>                | 0.786** | 0.836** | 0.426   | 0.028   | 0.553*  | 0.666*  | 0.877** | 0.740** | 0.763** | 0.799** |
| ff- <i>n</i> -alkanes         | 0.852** | 0.861** | 0.701** | 0.199   | 0.805** | 0.732** | 0.846** | 0.718** | 0.732** | 0.856** |
| PAHs                          | 0.880** | 0.916** | 0.628*  | 0.196   | 0.692** | 0.739** | 0.898** | 0.807** | 0.837** | 0.892** |
| Levoglucosan                  | 0.731** | 0.52    | 0.515   | 0.616*  | 0.716** | 0.669*  | 0.651*  | 0.697** | 0.682*  | 0.504   |
| K <sup>+</sup>                | 0.827** | 0.914** | 0.485   | 0.095   | 0.606*  | 0.676*  | 0.894** | 0.768** | 0.842** | 0.860** |
| SO <sub>4</sub> <sup>2-</sup> | 0.884** | 0.968** | 0.639*  | 0.03    | 0.707** | 0.782** | 0.895** | 0.738** | 0.837** | 0.952** |
| NO <sub>3</sub> <sup>-</sup>  | 0.678*  | 0.654*  | 0.281   | 0.244   | 0.393   | 0.511   | 0.799** | 0.774** | 0.690** | 0.612*  |
| NH <sub>4</sub> <sup>+</sup>  | 0.881** | 0.966** | 0.637*  | 0.032   | 0.722** | 0.774** | 0.894** | 0.737** | 0.836** | 0.945** |

\*\*Significant correlation at the 0.01 level.

\*Significant correlation at the 0.05 level.

Red data in parentheses represent negative values.

Table S5. Pearson correlations between individual NAC species and meteorological parameters, aerosol components, and gas pollutants during autumn (n = 13).

|                               | NACs    | 4NP     | 3M4NP   | 2,4-DNP | 4NGA    | 5NGA  | 4NC     | 4M5NC   | 3NSA  | 5NSA    |
|-------------------------------|---------|---------|---------|---------|---------|-------|---------|---------|-------|---------|
| PM <sub>2.5</sub>             | 0.684** | 0.715** | 0.211   | (0.02)  | 0.240   | 0.467 | 0.409   | 0.768** | 0.393 | 0.660*  |
| SO <sub>2</sub>               | 0.805** | 0.847** | 0.031   | (0.169) | (0.016) | 0.211 | 0.659*  | 0.633*  | 0.177 | 0.838** |
| NO <sub>2</sub>               | 0.886** | 0.932** | (0.286) | (0.002) | (0.255) | 0.026 | 0.823** | 0.588*  | 0.173 | 0.899** |
| O <sub>3</sub>                | 0.165   | 0.227   | (0.104) | (0.316) | 0.115   | 0.258 | (0.028) | 0.482   | 0.38  | 0.145   |
| ff- <i>n</i> -alkanes         | 0.943** | 0.932** | (0.16)  | 0.296   | (0.082) | 0.225 | 0.844** | 0.647*  | 0.174 | 0.894** |
| PAHs                          | 0.886** | 0.879** | (0.135) | 0.124   | (0.119) | 0.153 | 0.825** | 0.533   | 0.043 | 0.901** |
| Levoglucosan                  | 0.888** | 0.809** | (0.351) | 0.090   | (0.143) | 0.223 | 0.847** | 0.696** | 0.207 | 0.799** |
| K <sup>+</sup>                | 0.808** | 0.799** | (0.052) | 0.012   | 0.111   | 0.379 | 0.616*  | 0.771** | 0.318 | 0.773** |
| SO <sub>4</sub> <sup>2-</sup> | 0.615*  | 0.636*  | 0.29    | (0.1)   | 0.304   | 0.475 | 0.354   | 0.730** | 0.266 | 0.592*  |
| NO <sub>3</sub> <sup>-</sup>  | 0.700** | 0.889** | 0.143   | 0.078   | (0.090) | 0.02  | 0.53    | 0.374   | 0.084 | 0.801** |
| NH <sub>4</sub> <sup>+</sup>  | 0.715** | 0.760** | 0.172   | (0.128) | 0.178   | 0.407 | 0.471   | 0.729** | 0.287 | 0.720** |

\*\*Significant correlation at the 0.01 level.

\*Significant correlation at the 0.05 level.

Red data in parentheses represent negative values.

Table S6. Pearson correlations between individual NAC species and meteorological parameters, aerosol components, and gas pollutants during winter (n = 12).

|                               | NACs    | 4NP     | 3M4NP   | 2,4-DNP | 4NGA    | 5NGA    | 4NC     | 4M5NC   | 3NSA    | 5NSA    |
|-------------------------------|---------|---------|---------|---------|---------|---------|---------|---------|---------|---------|
| PM <sub>2.5</sub>             | 0.710** | 0.768** | 0.324   | 0.674*  | 0.262   | 0.553   | 0.456   | 0.628*  | 0.592*  | 0.539   |
| SO <sub>2</sub>               | 0.659*  | 0.749** | 0.671*  | 0.241   | (0.190) | (0.229) | 0.485   | 0.33    | 0.509   | 0.755** |
| NO <sub>2</sub>               | 0.879** | 0.720** | 0.687*  | 0.557   | (0.168) | 0.095   | 0.901** | 0.108   | 0.712** | 0.611*  |
| O <sub>3</sub>                | 0.55    | 0.567   | 0.114   | 0.311   | 0.281   | 0.582*  | 0.284   | 0.718** | 0.503   | 0.489   |
| ff- <i>n</i> -alkanes         | 0.790** | 0.853** | 0.56    | 0.566   | 0.313   | 0.605*  | 0.504   | 0.602*  | 0.751** | 0.656*  |
| PAHs                          | 0.817** | 0.883** | 0.892** | 0.358   | (0.149) | (0.082) | 0.589*  | 0.4     | 0.763** | 0.896** |
| Levogluconan                  | 0.835** | 0.692*  | 0.373   | 0.484   | 0.244   | 0.593*  | 0.682*  | 0.562   | 0.797** | 0.605*  |
| K <sup>+</sup>                | 0.768** | 0.760** | 0.402   | 0.570   | 0.359   | 0.571   | 0.561   | 0.552   | 0.642*  | 0.571   |
| SO <sub>4</sub> <sup>2-</sup> | 0.453   | 0.625*  | 0.249   | 0.659*  | 0.118   | 0.328   | 0.251   | 0.373   | 0.271   | 0.324   |
| NO <sub>3</sub> <sup>-</sup>  | 0.56    | 0.716** | 0.524   | 0.324   | (0.047) | (0.013) | 0.413   | 0.258   | 0.284   | 0.517   |
| NH <sub>4</sub> <sup>+</sup>  | 0.413   | 0.596*  | 0.271   | 0.587*  | 0.045   | 0.233   | 0.243   | 0.274   | 0.201   | 0.299   |

\*\*Significant correlation at the 0.01 level.

\*Significant correlation at the 0.05 level.

Red data in parentheses represent negative values.

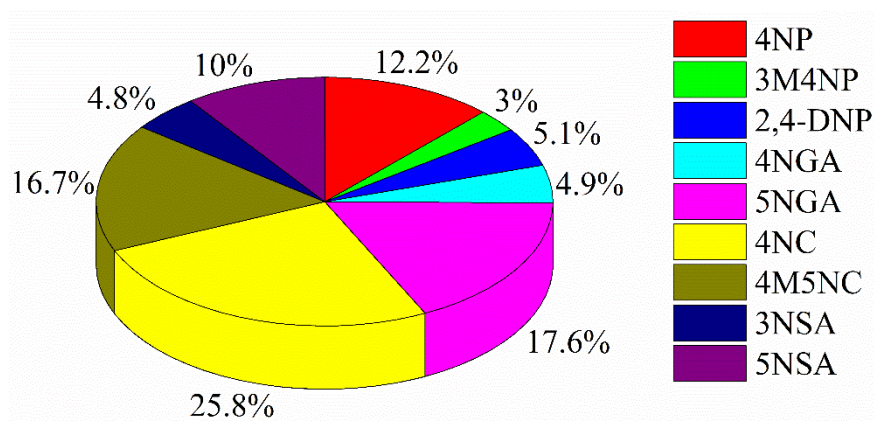

Fig. S1 Relative contribution of each NACs species during the whole year (4NP: 4-nitrophenol; 3M4NP: 3-methyl-4-nitrophenol; 2,4-DNP: 2,4-dinitrophenol; 4NGA: 4-nitroguaiacol; 5NGA: 5-nitroguaiacol; 4NC: 4-nitrocatechol; 4M5NC: 4-methyl-5-nitrocatechol; 3NSA: 3-nitrosalicylic acid; 5NSA: 5-nitrosalicylic acid).
